# Supplementary material
Source: PubMed Central journal article supplement (PMC2650494)
Supplement: NIHMS79315-supplement-Supplementary.pdf [file NIHMS79315-supplement-Supplementary.pdf]

## S : Supporting Information

### *Tyrosine sulfate isosteres of CCR5 N-terminus as tools for studying HIV-1 entry*

Son N. Lam,<sup>a</sup> Priyamvada Acharya,<sup>b</sup> Chih-Chin Huang,<sup>b</sup> Richard T. Wyatt,<sup>b</sup> Peter D. Kwong,<sup>b</sup> and Carole A. Bewley<sup>a\*</sup>

<sup>a</sup>Laboratory of Bioorganic Chemistry, National Institute of Diabetes, Digestive, and Kidney Diseases and <sup>b</sup>Vaccine Research Center, National Institute of Allergy and Infectious Diseases National Institutes of Health, DHHS, Bethesda, Maryland 20892

|                                                                                                         |         |
|---------------------------------------------------------------------------------------------------------|---------|
| Preparation of <i>N</i> -Fluorenylmethoxycarbonyl p-sulfonylmethyl L-phenylalanine ( <b>Fmoc-TYSN</b> ) | S-2     |
| Figure <b>S1</b> . Elemental analysis of Fmoc-TYSN.                                                     | S-2     |
| Figure <b>S2</b> . <sup>1</sup> H and <sup>13</sup> C NMR spectra of <b>9</b> .                         | S-3     |
| Figure <b>S3</b> . Mass spectra of <b>9</b> .                                                           | S-4     |
| Figure <b>S4</b> . Elemental analysis of <b>9</b> .                                                     | S-4     |
| Figure <b>S5</b> . <sup>1</sup> H and <sup>13</sup> C NMR spectra of <b>10</b>                          | S-5     |
| Figure <b>S6</b> . Mass spectra of <b>10</b> .                                                          | S-6     |
| Figure <b>S7</b> . Elemental analysis of <b>10</b> .                                                    | S-6     |
| Figure <b>S8</b> . <sup>1</sup> H and <sup>13</sup> C NMR spectra of <b>11</b> .                        | S-7     |
| Figure <b>S9</b> . Mass spectrum of <b>11</b> .                                                         | S-8     |
| Figure <b>S10</b> . Mass spectrum of <b>11b</b> .                                                       | S-8     |
| Figure <b>S11</b> . Mass spectrum of <b>12</b> .                                                        | S-9     |
| Figure <b>S12</b> . Sensorgrams of gp120 (YU2) binding to immobilized <b>12</b> .                       | S-10    |
| Figure <b>S13</b> . Sensorgrams of CD4 binding to immobilized <b>12</b> .                               | S-10    |
| Figure <b>S14</b> . Sensorgrams of gp120-CD4 binding to immobilized <b>12</b> .                         | S-10    |
| Figure <b>S15</b> . Mass normalized sensorgrams                                                         | S-11    |
| Figure <b>S16</b> . Best fit curves and residuals of CD4-YU2 binding to immobilized <b>12</b> .         | S-11    |
| <b>Table S1</b> . <sup>1</sup> H and <sup>13</sup> C NMR assignments of <b>2</b>                        | S-12    |
| <b>Table S2</b> . <sup>1</sup> H and <sup>13</sup> C NMR assignments of <b>3</b>                        | S-13    |
| <b>Table S3</b> . <sup>1</sup> H and <sup>13</sup> C NMR assignments of <b>4</b>                        | S-14    |
| <b>Table S4</b> . <sup>1</sup> H and <sup>13</sup> C NMR assignments of <b>5</b>                        | S-15    |
| <b>Table S5</b> . <sup>1</sup> H and <sup>13</sup> C NMR assignments of <b>6</b>                        | S-16    |
| <b>Table S6</b> . <sup>1</sup> H and <sup>13</sup> C NMR assignments of <b>12</b>                       | S-17,18 |

**N-fluorenylmethoxycarbonyl *p*-sulfonylmethyl *L*-phenylalanine (Fmoc-TYSN).** Fmoc-TYSN was synthesized starting from *L*-phenylalanine following the procedures detailed by Rivier and coworkers.<sup>1</sup> HRMS (TOF-MS ES) *m/z* 480.1096 (480.1117 Calcd for C<sub>25</sub>H<sub>22</sub>NO<sub>7</sub>S [M-H]).

**Figure S1. Elemental analysis of FmocTYSN.**

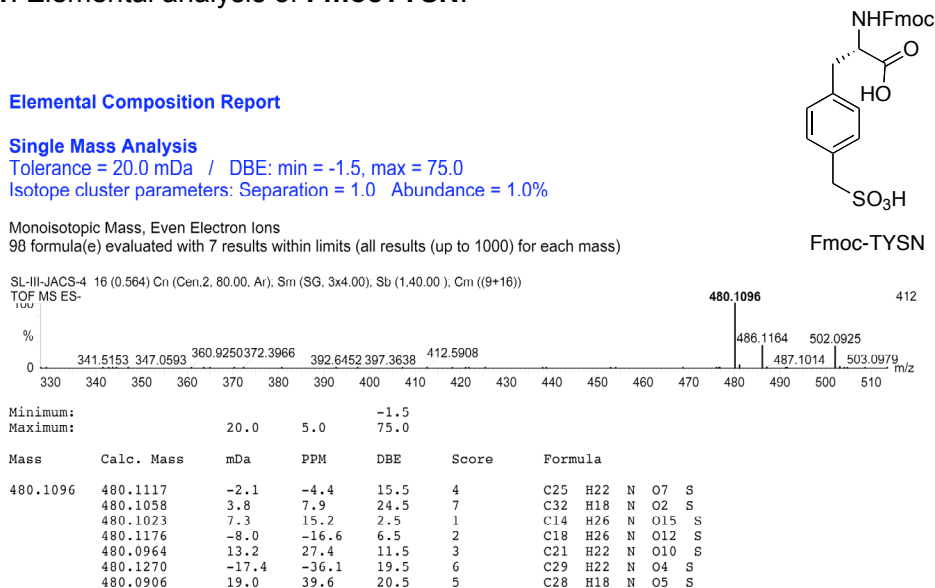

<sup>1</sup> Miranda, M.T.M.; Liddle, R.A.; Rivier, J.E. *J. Med. Chem.* **1993**, *36*(12), 1681-1688.

Figure S2.  $^1\text{H}$  and  $^{13}\text{C}$  NMR spectra of **9**.

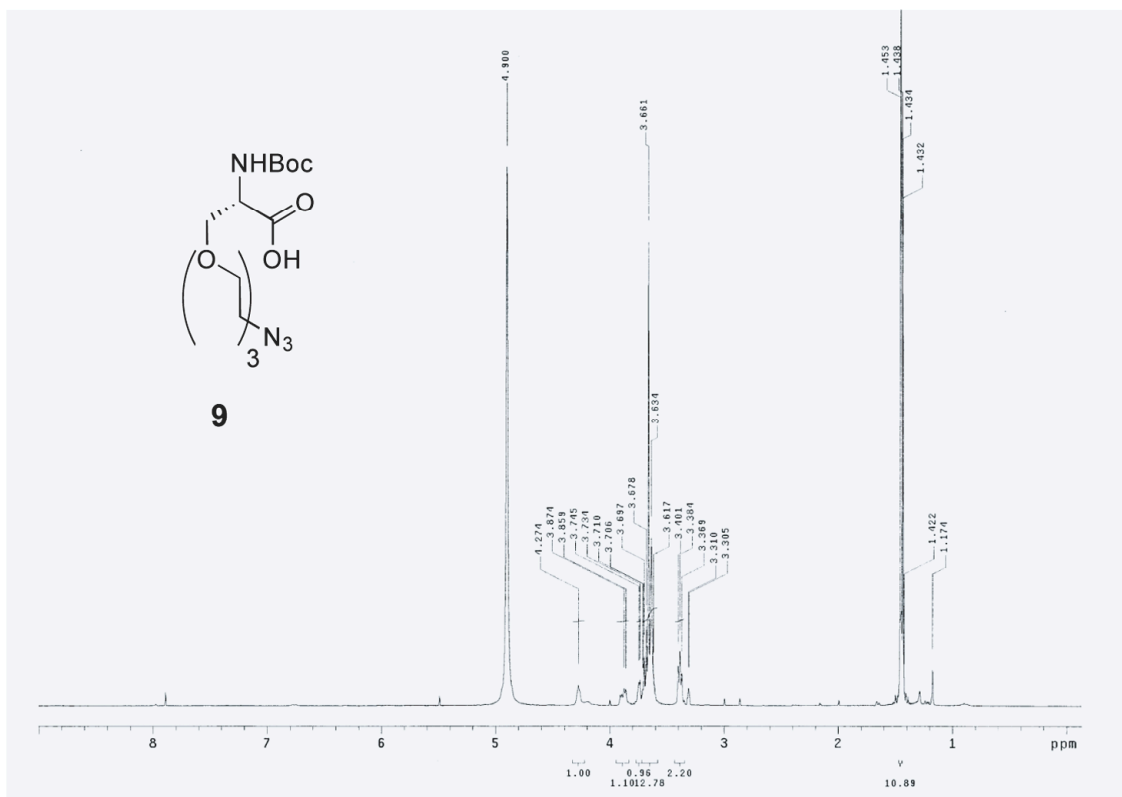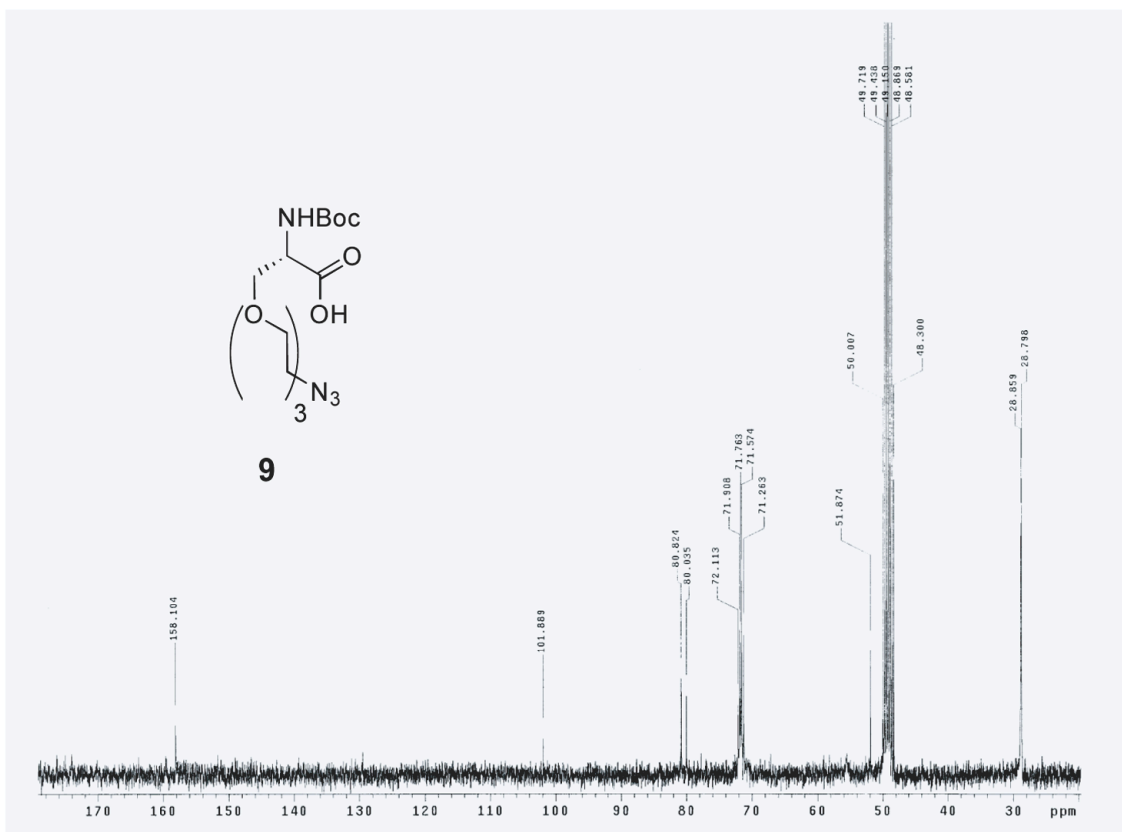

**Figure S3.** FT-IR spectrum of **9**.

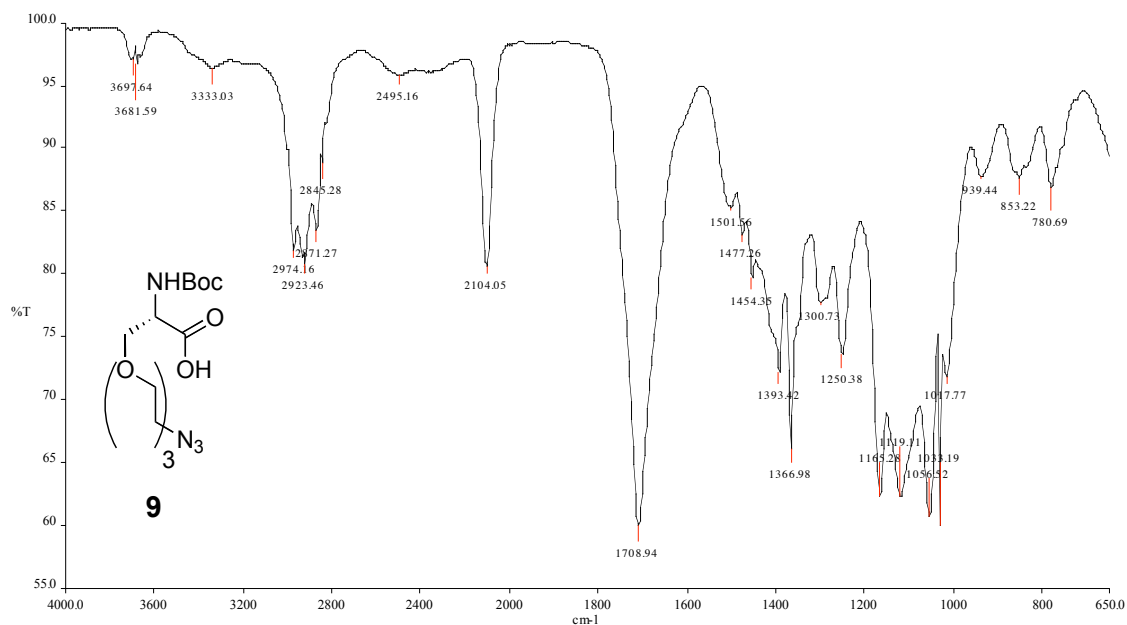

**Figure S4.** Elemental analysis of **9**.

**Elemental Composition Report**

**Single Mass Analysis**

Tolerance = 20.0 mDa / DBE: min = -1.5, max = 75.0  
 Isotope cluster parameters: Separation = 1.0 Abundance = 1.0%

Monoisotopic Mass, Even Electron Ions  
 60 formula(e) evaluated with 5 results within limits (all results (up to 1000) for each mass)

sl-ii-159n 48 (0.894) Cn (Cen,2, 80.00, Ar); Sm (SG, 3x4.00); Sb (1,40.00)  
 TOF MS ES-

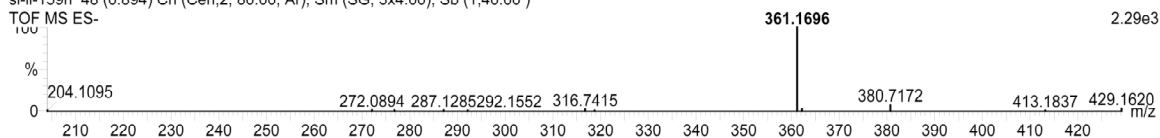

Minimum: -1.5  
 Maximum: 20.0 5.0 75.0

| Mass     | Calc. Mass | mDa   | PPM   | DBE  | Score | Formula        |
|----------|------------|-------|-------|------|-------|----------------|
| 361.1696 | 361.1723   | -2.7  | -7.5  | 4.5  | 2     | C14 H25 N4 O7  |
|          | 361.1665   | 3.1   | 8.7   | 13.5 | 5     | C21 H21 N4 O2  |
|          | 361.1571   | 12.5  | 34.7  | 0.5  | 1     | C10 H25 N4 O10 |
|          | 361.1876   | -18.0 | -49.8 | 8.5  | 4     | C18 H25 N4 O4  |
|          | 361.1512   | 18.4  | 51.0  | 9.5  | 3     | C17 H21 N4 O5  |

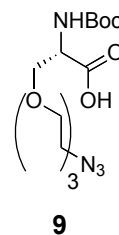

Figure S5.  $^1\text{H}$  and  $^{13}\text{C}$  NMR spectra of **10**.

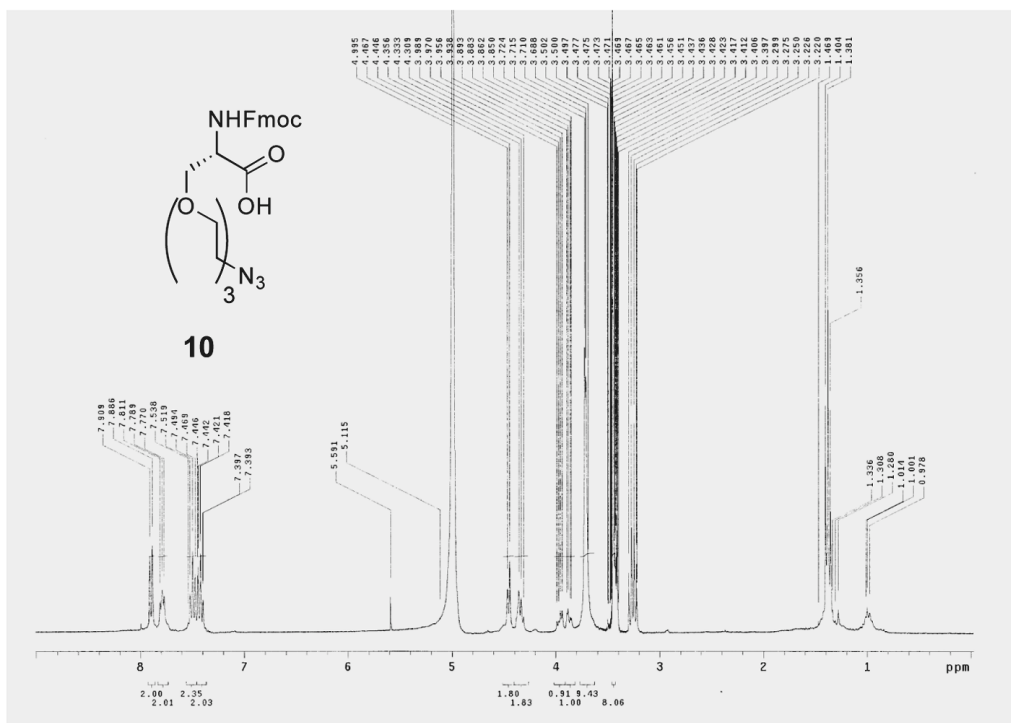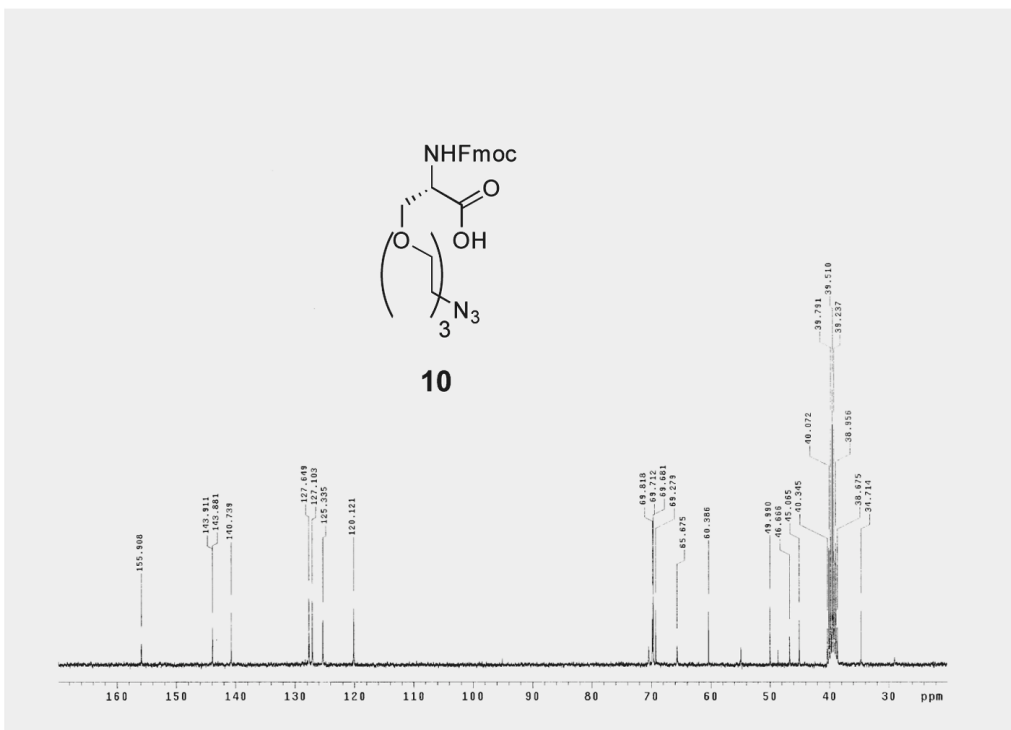

**Figure S6.** FT-IR spectrum of **10**.

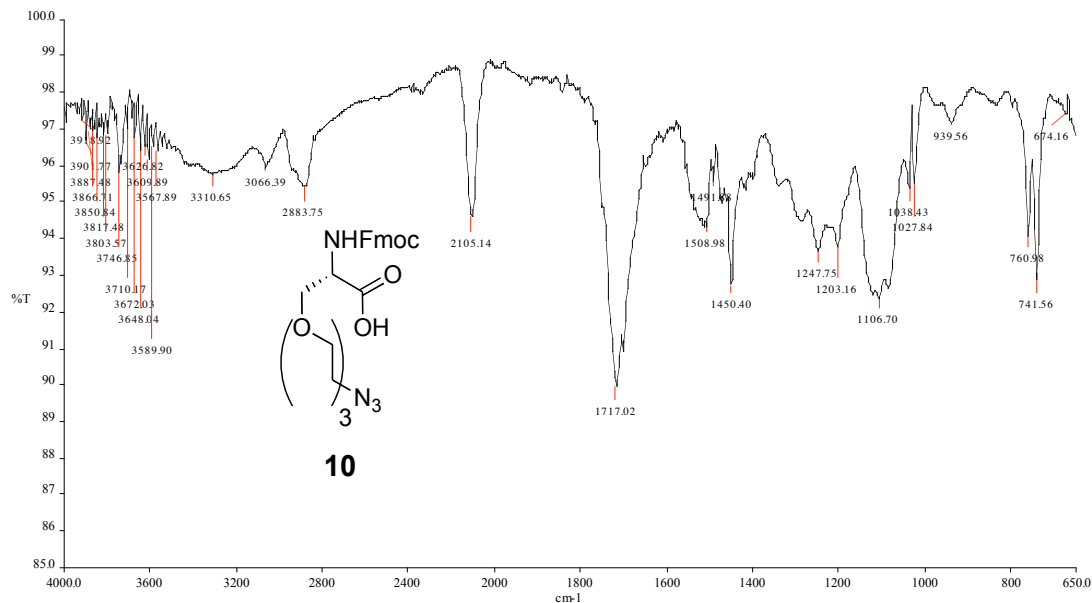

**Figure S7.** Elemental analysis of **10**.

**Elemental Composition Report**

**Single Mass Analysis**

Tolerance = 20.0 mDa / DBE: min = -1.5, max = 75.0  
 Isotope cluster parameters: Separation = 1.0 Abundance = 1.0%

Monoisotopic Mass, Even Electron Ions

104 formula(e) evaluated with 6 results within limits (all results (up to 1000) for each mass)

SL II 2

vl\_111604\_7 14 (0.563) AM (Cen,2, 80.00, Ar,10000.0,556.28,0.70,LS 3); Sm (SG, 3x4.00); Sb (1,40.00); Sb (1,40.00)

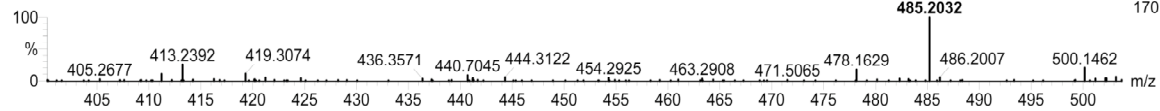

Minimum: -1.5  
 Maximum: 20.0 5.0 75.0

| Mass     | Calc. Mass | mDa   | PPM   | DBE  | Score | Formula                                                        |
|----------|------------|-------|-------|------|-------|----------------------------------------------------------------|
| 485.2032 | 485.2036   | -0.4  | -0.9  | 12.5 | 4     | C <sub>24</sub> H <sub>29</sub> N <sub>4</sub> O <sub>7</sub>  |
|          | 485.1978   | 5.4   | 11.2  | 21.5 | 6     | C <sub>31</sub> H <sub>25</sub> N <sub>4</sub> O <sub>2</sub>  |
|          | 485.2095   | -6.3  | -13.0 | 3.5  | 2     | C <sub>17</sub> H <sub>33</sub> N <sub>4</sub> O <sub>12</sub> |
|          | 485.1942   | 9.0   | 18.5  | -0.5 | 1     | C <sub>13</sub> H <sub>33</sub> N <sub>4</sub> O <sub>15</sub> |
|          | 485.1884   | 14.8  | 30.6  | 8.5  | 3     | C <sub>20</sub> H <sub>29</sub> N <sub>4</sub> O <sub>10</sub> |
|          | 485.2189   | -15.7 | -32.3 | 16.5 | 5     | C <sub>28</sub> H <sub>29</sub> N <sub>4</sub> O <sub>4</sub>  |

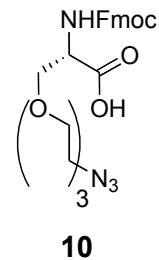

Figure S8. <sup>1</sup>H and <sup>13</sup>C NMR spectra of 11.

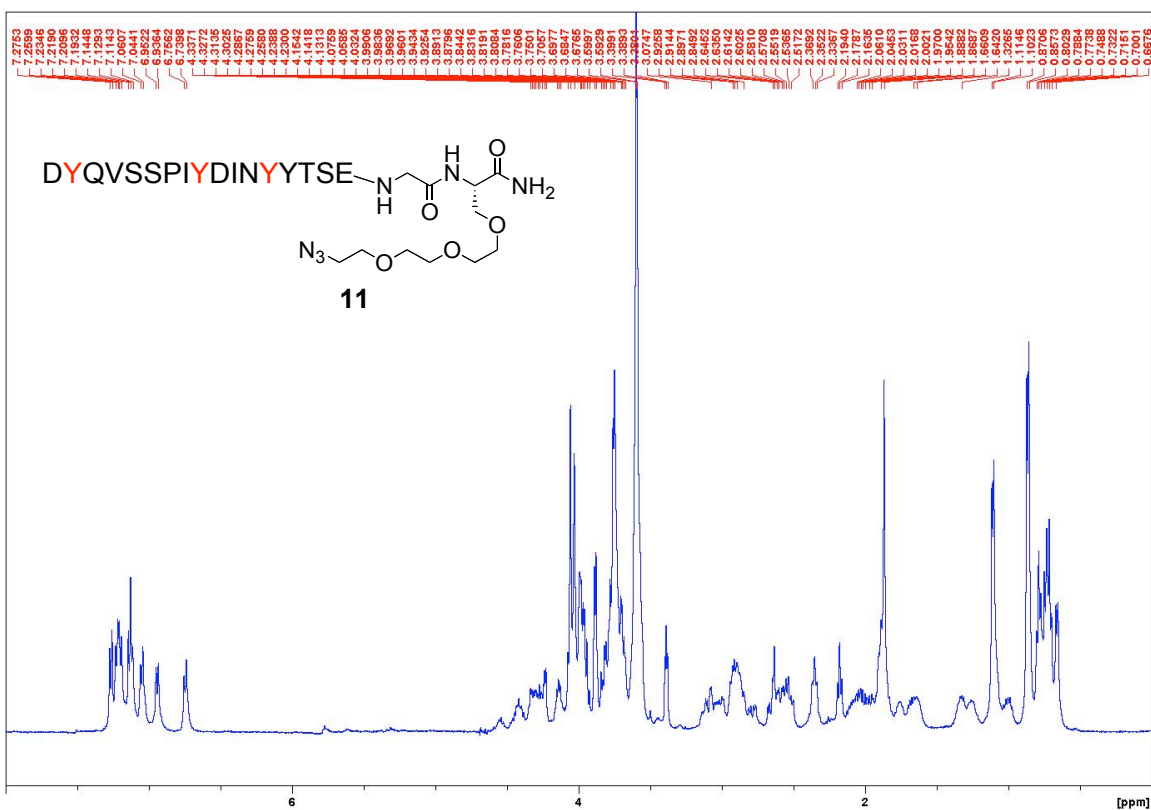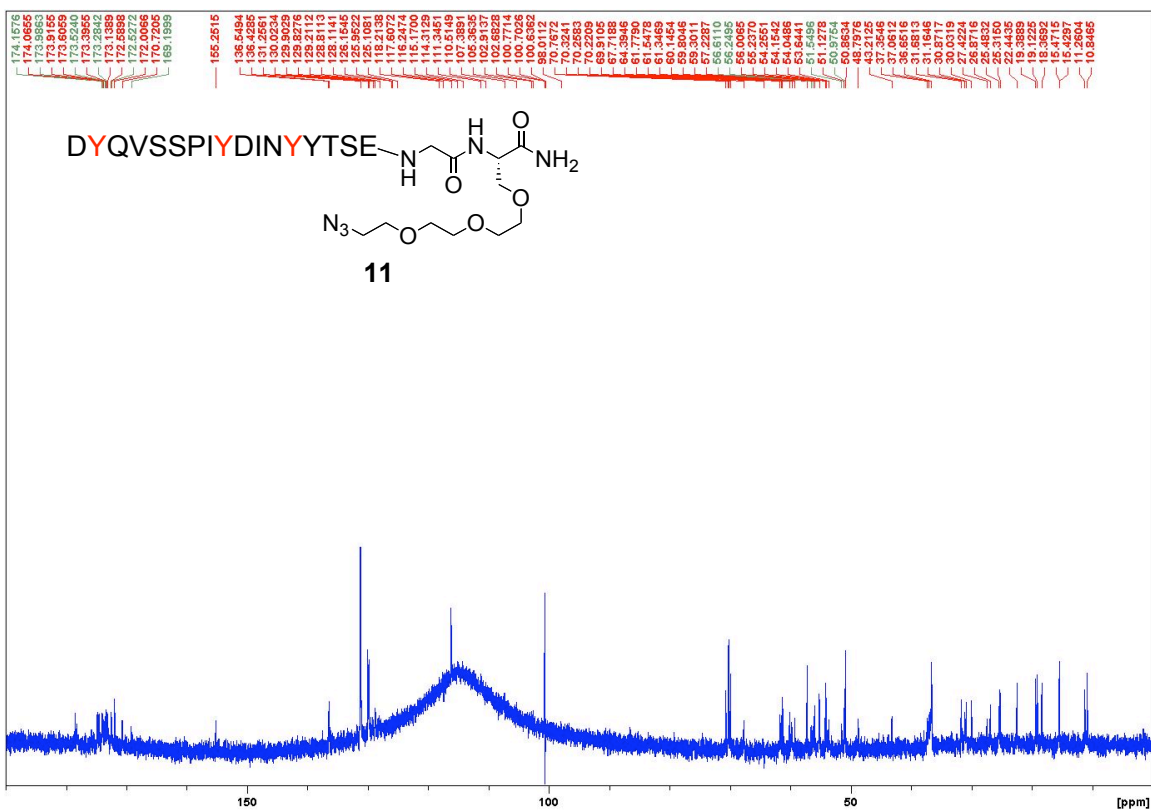

**Figure S9.** Mass spectra (TOFMS-ES) of **11**.

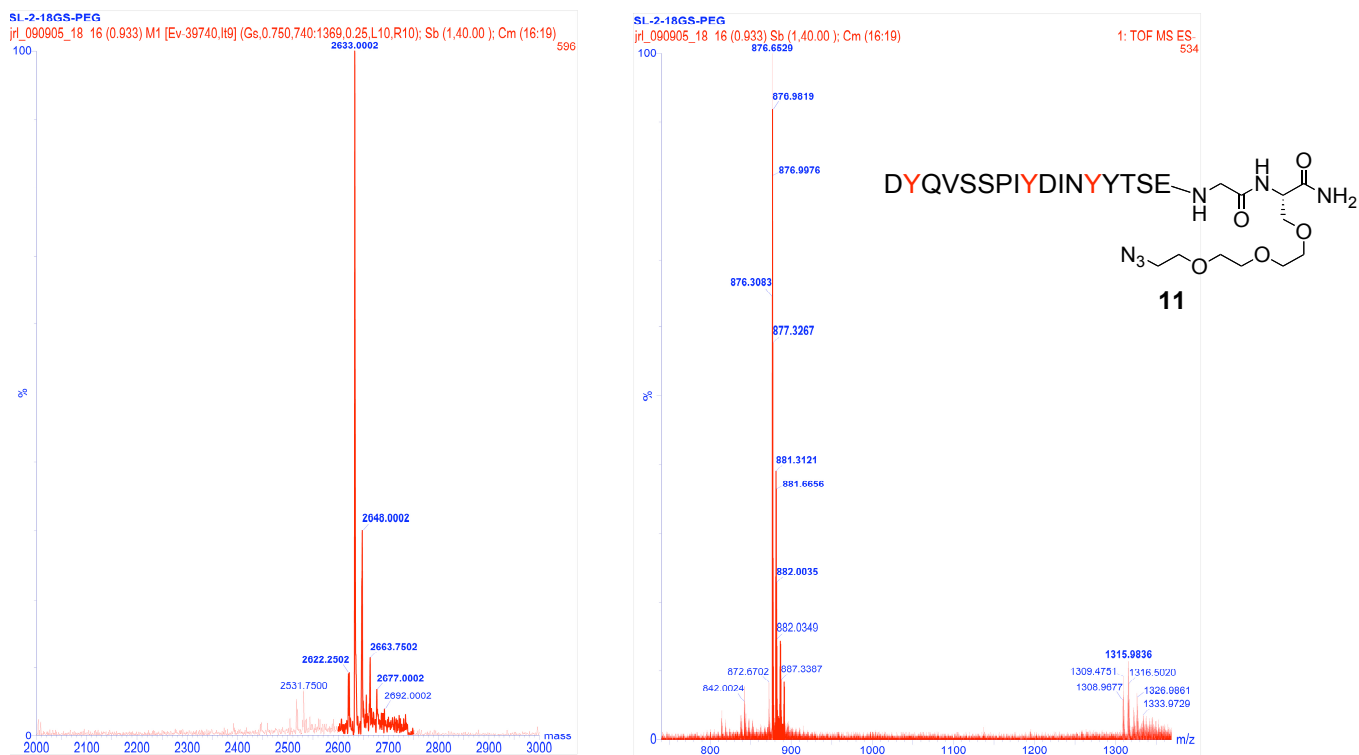

**Figure S10.** Mass spectra (TOFMS-ES) of **11b**.

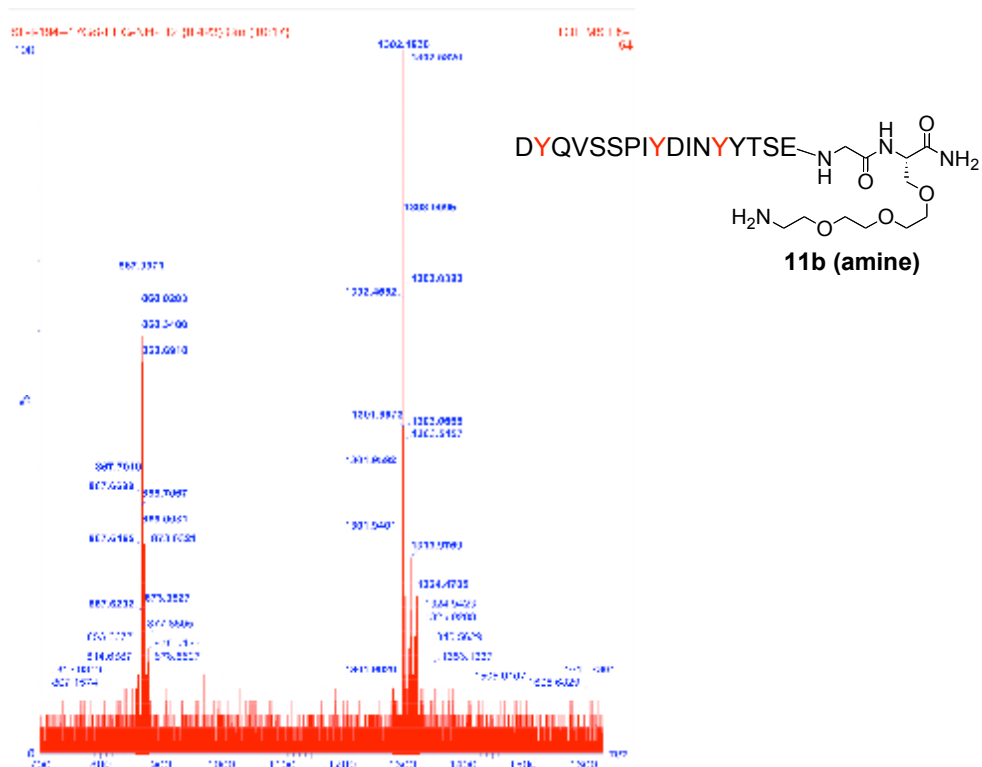





Surface plasmon resonance data for proteins binding to immobilized analog 12.

**Figure S12.** YU2 gp120 (5.0 $\mu$ M to 39nM) introduced to immobilized peptide 12.

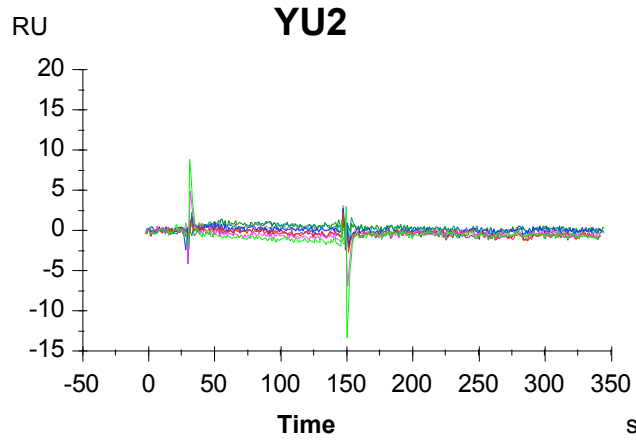

**Figure S13.** CD4 (5.0 $\mu$ M to 39nM) introduced to immobilized peptide 12.

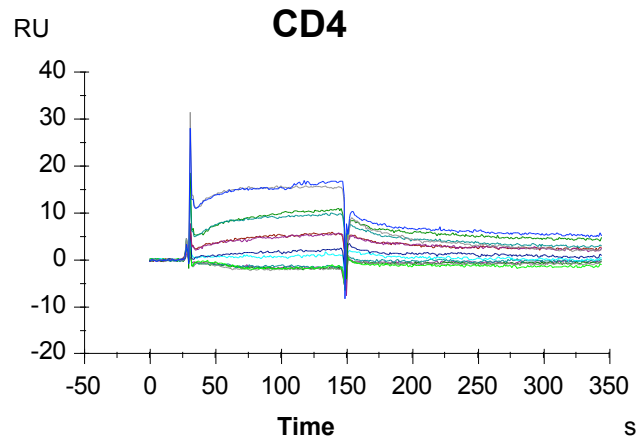

**Figure S14.** Stoichiometric complex of gp120-CD4 introduced to immobilized peptide 12.

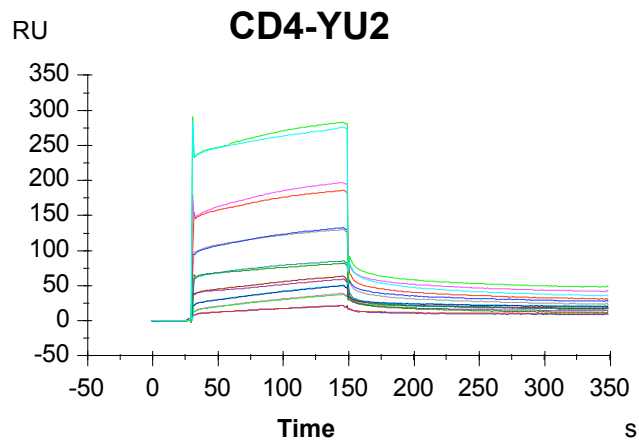

**Figure S15.** Mass normalized sensorgram of binding curves at 1.25 $\mu$ M.

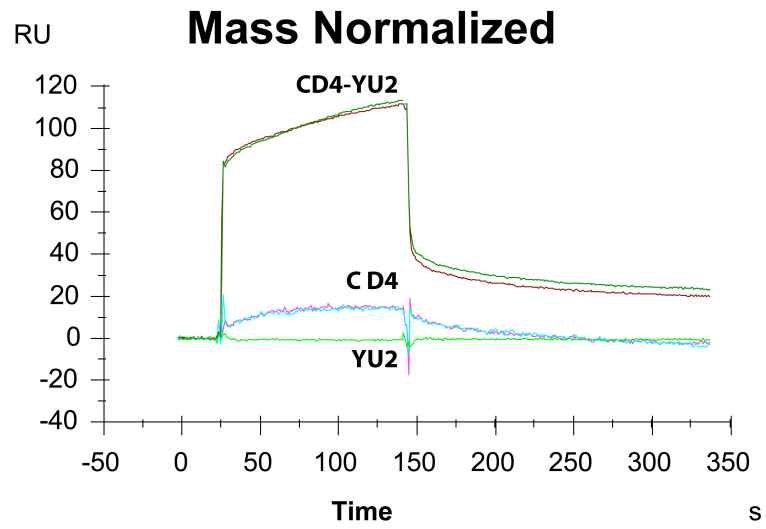

**Figure S16.** Binding curves of complex best fitted to 1<sup>st</sup> order kinetics with residuals shown below.

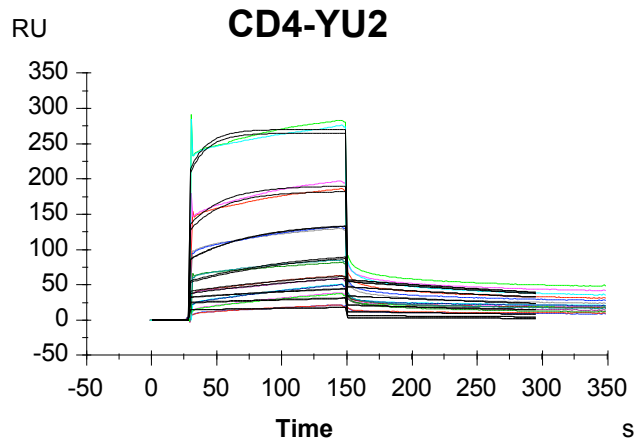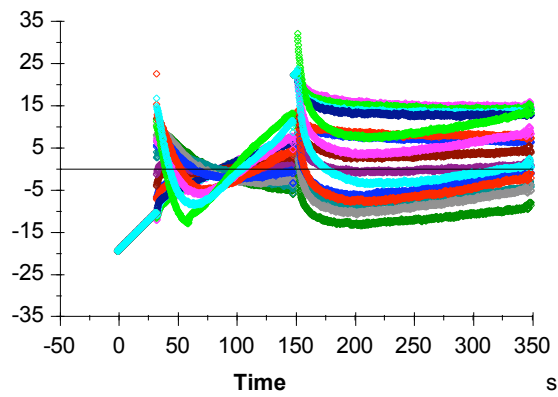

| Ac-DYQVSSPI-Tys-DIN-Typ-Y-CONH <sub>2</sub> (2) |        |      |      |       |      |       |      |       |      |        |      |        |       |       |
|-------------------------------------------------|--------|------|------|-------|------|-------|------|-------|------|--------|------|--------|-------|-------|
| Pos#                                            | Res    | NH   | HA   | CA    | HB   | CB    | HG   | CG    | HD   | CD     | HE   | CE     | amide | amide |
| 2                                               | ASP    | 8.10 | 4.42 | 51.58 | 2.50 | 38.38 | --   | --    | --   | --     | --   | --     |       |       |
|                                                 |        | --   | --   | --    | 2.36 | --    | --   | --    | --   | --     | --   | --     |       |       |
| 3                                               | TYR    | 7.97 | 4.46 | 54.75 | 2.96 | 35.90 | --   | --    | 7.00 | 130.48 | 6.73 | 115.48 |       |       |
|                                                 |        | --   | --   | --    | 2.85 | --    | --   | --    | --   | --     | --   | --     |       |       |
| 4                                               | GLN    | 8.15 | 4.22 | 52.73 | 1.94 | 26.85 | 2.16 | 30.94 | --   | --     | --   | --     | 7.45  | 6.74  |
|                                                 |        | --   | --   | --    | 1.83 | --    | --   | --    | --   | --     | --   | --     |       |       |
| 5                                               | VAL    | 8.12 | 4.05 | 59.47 | 2.02 | 30.11 | 0.86 | 17.96 | --   | --     | --   | --     |       |       |
| 6                                               | SER    | 8.30 | 4.41 | 55.27 | 3.75 | 61.11 | --   | --    | --   | --     | --   | --     |       |       |
| 7                                               | SER    | 8.23 | 4.66 | 53.72 | 3.76 | 60.87 | --   | --    | --   | --     | --   | --     |       |       |
|                                                 |        | --   | --   | --    | 3.72 | --    | --   | --    | --   | --     | --   | --     |       |       |
| 8                                               | PRO    | --   | 4.29 | 60.38 | 2.08 | 29.35 | 1.89 | 21.70 | 3.70 | 47.87  | --   | --     |       |       |
|                                                 |        | --   | --   | --    | 1.62 | --    | --   | --    | 3.60 | --     | --   | --     |       |       |
| 9                                               | ILE    | 7.94 | 3.94 | 58.41 | 1.61 | 35.90 | 1.26 | 24.51 | 0.71 | 14.63  | --   | --     | HG'   | CG'   |
|                                                 |        | --   | --   | --    | --   | --    | 0.99 | --    | --   | --     | --   | --     | 0.66  | 10.06 |
| 10                                              | TYS    | 8.07 | 4.58 | 54.26 | 3.06 | 36.42 | --   | --    | 7.14 | 130.26 | 7.10 | 121.31 |       |       |
|                                                 |        | --   | --   | --    | 2.85 | --    | --   | --    | --   | --     | --   | --     |       |       |
| 11                                              | ASP    | 8.21 | 4.55 | 50.90 | 2.67 | 38.68 | --   | --    | --   | --     | --   | --     |       |       |
|                                                 |        | --   | --   | --    | 2.49 | --    | --   | --    | --   | --     | --   | --     |       |       |
| 12                                              | ILE    | 8.08 | 4.03 | 59.15 | 1.83 | 35.90 | 1.36 | 24.51 | 0.81 | 14.74  | --   | --     | HG'   | CG'   |
|                                                 |        | --   | --   | --    | --   | --    | 1.13 | --    | --   | --     | --   | --     | 0.81  | 10.67 |
| 13                                              | ASN    | 8.38 | 4.54 | 50.72 | 2.57 | 36.19 | --   | --    | --   | --     | --   | --     | 7.58  | 6.82  |
| 14                                              | TYP    | 7.95 | 4.31 | 54.94 | 2.89 | 36.39 | --   | --    | 6.86 | 129.90 | 6.98 | 120.55 |       |       |
|                                                 |        |      |      |       | 2.74 | --    | --   | --    | --   | --     | --   | --     |       |       |
| 15                                              | TYR    | 8.01 | 4.30 | 55.77 | 3.01 | 35.74 | --   | --    | 7.04 | 130.48 | 6.74 | 115.48 |       |       |
|                                                 |        |      |      |       | 2.68 | --    | --   | --    | --   | --     | --   | --     |       |       |
|                                                 | C-term |      | 7.15 | 6.37  |      |       |      |       |      | Ac(NH) |      | 1.82   | 23.33 |       |

| Ac-DYQVSSPI-Typ-DIN-Tys-Y-CONH <sub>2</sub> (3) |        |      |      |       |      |       |      |       |      |        |      |        |       |       |
|-------------------------------------------------|--------|------|------|-------|------|-------|------|-------|------|--------|------|--------|-------|-------|
| Pos#                                            | Res    | NH   | HA   | CA    | HB   | CB    | HG   | CG    | HD   | CD     | HE   | CE     | amide | amide |
| 2                                               | ASP    | 8.09 | 4.40 | 51.60 | 2.46 | 38.38 | --   | --    | --   | --     | --   | --     |       |       |
|                                                 |        | --   | --   | --    | 2.35 | --    | --   | --    | --   | --     | --   | --     |       |       |
| 3                                               | TYR    | 7.96 | 4.45 | 54.76 | 2.94 | 35.93 | --   | --    | 6.99 | 130.52 | 6.71 | 115.50 |       |       |
|                                                 |        | --   | --   | --    | 2.84 | --    | --   | --    | --   | --     | --   | --     |       |       |
| 4                                               | GLN    | 8.16 | 4.23 | 52.76 | 1.93 | 26.91 | 2.15 | 30.95 | --   | --     | --   | --     | 7.43  | 6.73  |
|                                                 |        | --   | --   | --    | 1.81 | --    | --   | --    | --   | --     | --   | --     |       |       |
| 5                                               | VAL    | 8.09 | 4.04 | 59.61 | 2.00 | 30.13 | 0.84 | 17.99 | --   | --     | --   | --     |       |       |
| 6                                               | SER    | 7.89 | 4.17 | 57.19 | 3.72 | 62.14 | --   | --    | --   | --     | --   | --     |       |       |
| 7                                               | SER    | 8.14 | 4.24 | 53.92 | 3.83 | 59.49 | --   | --    | --   | --     | --   | --     |       |       |
|                                                 |        |      |      |       | 3.78 | --    | --   | --    | --   | --     | --   | --     |       |       |
| 8                                               | PRO    | --   | 4.31 | 60.68 | 2.10 | 29.30 | 1.87 | 24.64 | 3.59 | 47.94  | --   | --     |       |       |
|                                                 |        | --   | --   | --    | 1.60 | --    | --   | --    | 3.54 | --     | --   | --     |       |       |
| 9                                               | ILE    | 7.87 | 3.90 | 58.54 | 1.61 | 35.82 | 1.26 | 24.58 | 0.68 | 10.07  | --   | --     | HG'   | CG'   |
|                                                 |        | --   | --   | --    | --   | --    | 0.98 | --    | --   | --     | --   | --     | 0.64  | 14.71 |
| 10                                              | TYP    | 7.94 | 4.55 | 54.44 | 3.02 | 36.15 | --   | --    | 7.02 | 129.74 | 6.99 | 120.51 |       |       |
|                                                 |        | --   | --   | --    | 2.81 | --    | --   | --    | --   | --     | --   | --     |       |       |
| 11                                              | ASP    | 8.11 | 4.52 | 51.36 | 2.63 | 38.64 | --   | --    | --   | --     | --   | --     |       |       |
|                                                 |        | --   | --   | --    | 2.50 | --    | --   | --    | --   | --     | --   | --     |       |       |
| 12                                              | ILE    | 8.03 | 4.00 | 59.06 | 1.77 | 35.93 | 1.30 | 24.51 | 0.77 | 10.63  | --   | --     | HG'   | CG'   |
|                                                 |        | --   | --   | --    | --   | --    | 1.09 | --    | --   | --     | --   | --     | 0.74  | 14.77 |
| 13                                              | ASN    | 8.35 | 4.54 | 50.66 | 2.55 | 36.15 | --   | --    | --   | --     | --   | --     | 7.56  | 6.79  |
| 14                                              | TYS    | 8.00 | 4.30 | 55.85 | 2.83 | 36.30 | --   | --    | 6.95 | 130.33 | 7.07 | 121.54 |       |       |
| 15                                              | TYR    | 7.95 | 4.31 | 54.95 | 2.98 | 35.84 | --   | --    | 7.03 | 130.52 | 6.74 | 115.50 |       |       |
|                                                 |        |      |      |       | 2.73 | --    |      |       |      |        |      |        |       |       |
|                                                 | C-term |      | 6.87 | 6.79  |      |       |      |       |      | Ac(NH) |      | 1.80   | 23.22 |       |

| Ac-DYQVSSPI-Tysn-DIN-Tysn-Y-CONH <sub>2</sub> (4) |      |      |      |      |      |      |      |      |      |       |      |       |                                 |       |
|---------------------------------------------------|------|------|------|------|------|------|------|------|------|-------|------|-------|---------------------------------|-------|
| Pos#                                              | Res  | NH   | HA   | CA   | HB   | CB   | HG   | CG   | HD   | CD    | HE   | CE    | amide                           | amide |
| 2                                                 | ASP  | 8.08 | 4.42 | 51.5 | 2.50 | 38.2 | --   | --   | --   | --    | --   | --    |                                 |       |
|                                                   |      | --   | --   | --   | 2.36 | 38.2 | --   | --   | --   | --    | --   | --    |                                 |       |
| 3                                                 | TYR  | 7.95 | 4.46 | 54.6 | 2.95 | 35.5 | --   | --   | 7.00 | 130.0 | 6.73 | 115.2 |                                 |       |
|                                                   |      | --   | --   | --   | 2.84 | 35.5 | --   | --   | --   | --    | --   | --    |                                 |       |
| 4                                                 | GLN  | 8.14 | 4.22 | 52.7 | 1.93 | 26.9 | 2.16 | 30.8 | --   | --    | --   | --    | 7.44                            | 6.73  |
|                                                   |      | --   | --   | --   | 1.82 | 26.9 | --   | --   | --   | --    | --   | --    |                                 |       |
| 5                                                 | VAL  | 8.06 | 4.02 | 59.3 | 1.99 | 30.0 | 0.85 | 17.9 | --   | --    | --   | --    |                                 |       |
| 6                                                 | SER  | 8.28 | 4.41 | 55.2 | 3.75 | 60.9 | --   | --   | --   | --    | --   | --    |                                 |       |
| 7                                                 | SER  | 8.21 | 4.67 | 53.5 | 3.73 | 60.5 | --   | --   | --   | --    | --   | --    |                                 |       |
| 8                                                 | PRO  | --   | 4.30 | 60.3 | 2.09 | 29.2 | 1.88 | 24.2 | 3.69 | 48.0  | --   | --    |                                 |       |
|                                                   |      | --   | --   | --   | 1.66 | 29.2 | --   | --   | 3.61 | 48.0  | --   | --    |                                 |       |
| 9                                                 | ILE  | 7.92 | 3.93 | 58.4 | 1.61 | 35.9 | 1.24 | 24.1 | 0.70 | 10.1  | --   | --    | HG'                             | CG'   |
|                                                   |      | --   | --   | --   | --   | --   | 0.97 | 24.1 |      |       | --   | --    | 0.64                            | 14.5  |
| 10                                                | TYSN | 7.98 | 4.57 | 54.2 | 3.05 | 36.6 | --   | --   | 7.09 | 128.9 | 7.20 | 130.0 | CH <sub>2</sub> SO <sub>3</sub> |       |
|                                                   |      | --   | --   | --   | 2.86 | 36.6 | --   | --   | --   | --    | --   | --    | 3.98                            |       |
| 11                                                | ASP  | 8.15 | 4.54 | 51.1 | 2.66 | 38.6 | --   | --   | --   | --    | --   | --    |                                 |       |
|                                                   |      | --   | --   | --   | 2.50 | 38.6 | --   | --   | --   | --    | --   | --    |                                 |       |
| 12                                                | ILE  | 8.04 | 4.01 | 58.9 | 1.80 | 35.9 | 1.33 | 24.3 | 0.79 | 10.5  | --   | --    | HG'                             | CG'   |
|                                                   |      | --   | --   | --   | --   | --   | 1.12 | 24.3 | --   | --    | --   | --    | 0.78                            | 14.8  |
| 13                                                | ASN  | 8.34 | 4.53 | 50.7 | 2.56 | 35.9 | --   | --   | --   | --    | --   | --    | 7.57                            | 6.8   |
| 14                                                | TYSN | 7.94 | 4.33 | 55.4 | 2.90 | 36.6 | --   | --   | 6.93 | 128.9 | 7.19 | 130.0 | CH <sub>2</sub> SO <sub>3</sub> |       |
|                                                   |      | --   | --   | --   | 2.83 | 36.6 | --   | --   | --   | --    | --   | --    | 4.02                            |       |
| 15                                                | TYR  | 7.92 | 4.32 | 54.8 | 3.01 | 35.6 | --   | --   | 7.04 | 130.0 | 6.74 | 115.2 |                                 |       |
|                                                   |      | --   | --   | --   | 2.71 | 35.6 | --   | --   | --   | --    | --   | --    |                                 |       |

| Ac-DYQVSSPI-Tys-DIN-Tys-YTSE-CONH <sub>2</sub> (5) |       |                 |      |      |       |      |       |      |       |      |        |      |        |       |       |        |       |
|----------------------------------------------------|-------|-----------------|------|------|-------|------|-------|------|-------|------|--------|------|--------|-------|-------|--------|-------|
| Pos#                                               | Res   | <sup>15</sup> N | NH   | HA   | CA    | HB   | CB    | HG   | CG    | HD   | CD     | HE   | CE     | amide | amide |        |       |
| 2                                                  | ASP   | 126.32          | 8.09 | 4.41 | 1.59  | 2.49 | 38.23 | --   | --    | --   | --     | --   | --     | --    | --    |        |       |
|                                                    |       | --              | --   | --   | --    | 2.35 | --    | --   | --    | --   | --     | --   | --     | --    | --    |        |       |
| 3                                                  | TYR   | 120.04          | 7.96 | 4.45 | 54.96 | 2.96 | 35.94 | --   | --    | 6.99 | 130.53 | 6.72 | 115.47 | --    | --    |        |       |
|                                                    |       | --              | --   | --   | --    | 2.81 | --    | --   | --    | --   | --     | --   | --     | --    | --    |        |       |
| 4                                                  | GLN   | 122.22          | 8.14 | 4.21 | 52.73 | 1.91 | 26.67 | 2.15 | 30.91 | --   | --     | --   | --     | 7.43  | 6.73  | 112.51 |       |
|                                                    |       | --              | --   | --   | --    | 1.82 | --    | --   | --    | --   | --     | --   | --     | --    | --    |        |       |
| 5                                                  | VAL   | 121.52          | 8.07 | 4.01 | 59.50 | 1.98 | 30.06 | 0.84 | 18.25 | --   | --     | --   | --     | --    | --    |        |       |
| 6                                                  | SER   | 119.61          | 8.29 | 4.39 | 55.15 | 3.74 | 61.09 | --   | --    | --   | --     | --   | --     | --    | --    |        |       |
| 7                                                  | SER   | 119.09          | 8.21 | 4.65 | 53.74 | 3.73 | 60.56 | --   | --    | --   | --     | --   | --     | --    | --    |        |       |
| 8                                                  | PRO   |                 |      | 4.25 | 60.42 | 2.06 | 29.26 | 1.87 | 24.40 | 3.69 | 47.98  | --   | --     | --    | --    |        |       |
|                                                    |       | --              | --   | --   | --    | 1.59 | --    | --   | --    | 3.59 | --     | --   | --     | --    | --    |        |       |
| 9                                                  | ILE   | 119.96          | 7.90 | 3.91 | 58.38 | 1.58 | 35.94 | 1.25 | 24.44 | 0.69 | 9.75   | --   | --     | --    | --    | HG'    | CG'   |
|                                                    |       | --              | --   | --   | --    | --   | --    | 0.96 | --    | --   | --     | --   | --     | --    | --    | 0.64   | 14.51 |
| 10                                                 | TYS   | 123.17          | 8.03 | 4.57 | 54.35 | 3.05 | 36.47 | --   | --    | 7.12 | 130.26 | 7.08 | 121.39 | --    | --    |        |       |
|                                                    |       | --              | --   | --   | --    | 2.82 | --    | --   | --    | --   | --     | --   | --     | --    | --    |        |       |
| 11                                                 | ASP   | 122.32          | 8.15 | 4.52 | 50.96 | 2.64 | 38.75 | --   | --    | --   | --     | --   | --     | --    | --    |        |       |
|                                                    |       | --              | --   | --   | --    | 2.49 | --    | --   | --    | --   | --     | --   | --     | --    | --    |        |       |
| 12                                                 | ILE   | 121.61          | 8.04 | 3.99 | 59.06 | 1.75 | 36.03 | 1.33 | 24.24 | 0.78 | 10.80  | --   | --     | --    | --    | HG'    | CG'   |
|                                                    |       | --              | --   | --   | --    | --   | --    | 1.09 | --    | --   | --     | --   | --     | --    | --    | 0.72   | 14.60 |
| 13                                                 | ASN   | 121.22          | 8.32 | 4.54 | 50.66 | 2.55 | 36.02 | --   | --    | --   | --     | --   | --     | 7.56  | 6.79  | 113.45 |       |
| 14                                                 | TYS   | 120.36          | 7.96 | 4.36 | 55.67 | 2.94 | 36.11 | --   | --    | 6.96 | 130.20 | 7.07 | 121.39 | --    | --    |        |       |
|                                                    |       | --              | --   | --   | --    | 2.84 | --    | --   | --    | --   | --     | --   | --     | --    | --    |        |       |
| 15                                                 | TYR   | 121.05          | 7.93 | 4.45 | 54.96 | 2.96 | 35.94 | --   | --    | 7.02 | 130.53 | 6.72 | 115.47 | --    | --    |        |       |
|                                                    |       | --              | --   | --   | --    | 2.81 | --    | --   | --    | --   | --     | --   | --     | --    | --    |        |       |
| 16                                                 | THR   | 115.73          | 7.82 | 4.24 | 58.62 | 4.09 | 67.23 | 1.09 | 18.70 | --   | --     | --   | --     | --    | --    |        |       |
| 17                                                 | SER   | 118.17          | 8.19 | 4.31 | 55.81 | 3.78 | 60.99 | --   | --    | --   | --     | --   | --     | --    | --    |        |       |
| 18                                                 | GLU   | 123.26          | 8.31 | 4.15 | 53.70 | 1.97 | 27.38 | 2.16 | 33.45 | --   | --     | --   | --     | --    | --    |        |       |
|                                                    |       | --              | --   | --   | --    | 1.82 | --    | --   | --    | --   | --     | --   | --     | --    | --    |        |       |
|                                                    | CONH2 |                 |      |      |       |      |       |      |       |      |        |      |        | 7.46  | 6.99  | 107.95 |       |
|                                                    | AcNH  |                 |      | 1.86 | 21.53 |      |       |      |       |      |        |      |        |       |       |        |       |
|                                                    |       |                 |      |      |       |      |       |      |       |      |        |      |        |       |       |        |       |
|                                                    |       |                 |      |      |       |      |       |      |       |      |        |      |        |       |       |        |       |
|                                                    |       |                 |      |      |       |      |       |      |       |      |        |      |        |       |       |        |       |

| Ac-D-Tys-QVSSPI-Tys-DIN-Tys-YTSE-CONH <sub>2</sub> (6) |       |                 |      |      |       |      |       |      |       |      |        |      |        |       |       |      |       |
|--------------------------------------------------------|-------|-----------------|------|------|-------|------|-------|------|-------|------|--------|------|--------|-------|-------|------|-------|
| Pos#                                                   | Res   | <sup>15</sup> N | NH   | HA   | CA    | HB   | CB    | HG   | CG    | HD   | CD     | HE   | CE     | amide | amide |      |       |
| 2                                                      | ASP   | 126.37          | 8.08 | 4.42 | 51.54 | 2.50 | 38.43 | --   | --    | --   | --     | --   | --     | --    | --    |      |       |
|                                                        |       | --              | --   | --   | --    | 2.35 | --    | --   | --    | --   | --     | --   | --     | --    | --    |      |       |
| 3                                                      | TYS   | 123.33          | 8.07 | 4.49 | 54.35 | 3.01 | 36.15 | --   | --    | 7.13 | 130.41 | 7.13 | 121.51 | --    | --    |      |       |
|                                                        |       | --              | --   | --   | --    | 2.92 | --    | --   | --    | --   | --     | --   | --     | --    | --    |      |       |
| 4                                                      | GLN   | 122.45          | 8.17 | 4.21 | 52.73 | 1.91 | 26.94 | 2.16 | 30.93 | --   | --     | --   | --     | 7.43  | 6.73  |      |       |
|                                                        |       | --              | --   | --   | --    | 1.80 | --    | --   | --    | --   | --     | --   | --     | --    | --    |      |       |
| 5                                                      | VAL   | 121.83          | 8.12 | 4.00 | 59.47 | 1.97 | 30.11 | 0.84 | 18.41 | --   | --     | --   | --     | --    | --    |      |       |
|                                                        |       | --              | --   | --   | --    | --   | --    | 0.86 | 17.63 | --   | --     | --   | --     | --    | --    |      |       |
| 6                                                      | SER   | 119.97          | 8.31 | 4.39 | 55.41 | 3.73 | 61.27 | --   | --    | --   | --     | --   | --     | --    | --    |      |       |
| 7                                                      | SER   | 119.18          | 8.24 | 4.65 | 53.71 | 3.75 | 60.59 | --   | --    | --   | --     | --   | --     | --    | --    |      |       |
|                                                        |       | --              | --   | --   | --    | 3.69 | --    | --   | --    | --   | --     | --   | --     | --    | --    |      |       |
| 8                                                      | PRO   | --              | --   | 4.26 | 60.43 | 2.06 | 29.32 | 1.87 | 24.60 | 3.69 |        | --   | --     | --    | --    |      |       |
|                                                        |       | --              | --   | --   | --    | 1.59 | --    | --   | --    | 3.59 |        | --   | --     | --    | --    |      |       |
| 9                                                      | ILE   | 120.21          | 7.93 | 3.91 | 58.34 | 1.58 | 35.96 | 1.25 | 24.41 | 0.69 | 10.00  | --   | --     | --    | --    | HG'  | CG'   |
|                                                        |       | --              | --   | --   | --    | --   | --    | 0.97 | --    | --   | --     | --   | --     | --    | --    | 0.64 | 14.68 |
| 10                                                     | TYS   | 119.93          | 8.06 | 4.56 | 54.75 | 3.03 | 36.52 | --   | --    | 7.12 | 130.21 | 7.08 | 121.25 | --    | --    |      |       |
|                                                        |       | --              | --   | --   | --    | 2.81 | --    | --   | --    | --   | --     | --   | --     | --    | --    |      |       |
| 11                                                     | ASP   | 122.45          | 8.17 | 4.51 | 51.17 | 2.62 | 38.72 | --   | --    | --   | --     | --   | --     | --    | --    |      |       |
|                                                        |       | --              | --   | --   | --    | 2.47 | --    | --   | --    | --   | --     | --   | --     | --    | --    |      |       |
| 12                                                     | ILE   | 121.69          | 8.04 | 3.97 | 59.04 | 1.74 | 36.00 | 1.32 | 24.66 | 0.78 | 10.69  | --   | --     | --    | --    | HG'  | CG'   |
|                                                        |       | --              | --   | --   | --    | --   | --    | 1.08 | --    | --   | --     | --   | --     | --    | --    | 0.71 | 14.73 |
| 13                                                     | ASN   | 121.23          | 8.32 | 4.52 | 50.75 | 2.54 | 36.22 | --   | --    | --   | --     | --   | --     | 7.55  | 6.78  |      |       |
| 14                                                     | TYS   | 120.36          | 7.96 | 4.36 | 55.53 | 2.90 | 36.37 | --   | --    | 6.97 | 130.29 | 7.07 | 121.54 | --    | --    |      |       |
|                                                        |       | --              | --   | --   | --    | 2.85 | --    | --   | --    | --   | --     | --   | --     | --    | --    |      |       |
| 15                                                     | TYR   | 121.02          | 7.92 | 4.45 | 55.34 | 2.94 | 36.19 | --   | --    | 7.02 | 130.58 | 6.72 | 115.48 | --    | --    |      |       |
|                                                        |       | --              | --   | --   | --    | 2.82 | --    | --   | --    | --   | --     | --   | --     | --    | --    |      |       |
| 16                                                     | THR   | 115.75          | 7.83 | 4.23 | 58.63 | 4.09 | 67.24 | 1.07 | 18.61 | --   | --     | --   | --     | --    | --    |      |       |
| 17                                                     | SER   | 118.13          | 8.19 | 4.31 | 55.71 | 3.79 | 61.00 | --   | --    | --   | --     | --   | --     | --    | --    |      |       |
|                                                        |       | --              | --   | --   | --    | 3.75 | --    | --   | --    | --   | --     | --   | --     | --    | --    |      |       |
| 18                                                     | GLU   | 123.25          | 8.31 | 4.14 | 53.73 | 1.97 | 27.51 | 2.15 | 33.49 | --   | --     | --   | --     | --    | --    |      |       |
|                                                        |       | --              | --   | --   | --    | 1.82 | --    | --   | --    | --   | --     | --   | --     | --    | --    |      |       |
|                                                        | CONH2 |                 | 7.46 | 6.99 |       |      |       |      |       |      |        |      | AcNH   | 1.86  | 21.75 |      |       |



| Ac-D-Tysn-QVSSPI-Tysn-DIN-Tysn-YTSEG-ate -Ala(biotin)-CONH <sub>2</sub> ( <b>12</b> ) |                   |      |      |       |      |       |      |       |      |        |      |        |       |       |                                 |       |       |       |
|---------------------------------------------------------------------------------------|-------------------|------|------|-------|------|-------|------|-------|------|--------|------|--------|-------|-------|---------------------------------|-------|-------|-------|
| Pos#                                                                                  | Res               | NH   | HA   | CA    | HB   | CB    | HG   | CG    | HD   | CD     | HE   | CE     | amide | amide |                                 |       |       |       |
| 2                                                                                     | ASP               | 8.09 | 4.44 | 51.50 | 2.51 | 38.31 | --   | --    | --   | --     | --   | --     | --    | --    |                                 |       |       |       |
|                                                                                       |                   | --   | --   | --    | 2.38 | --    | --   | --    | --   | --     | --   | --     | --    | --    |                                 |       |       |       |
| 3                                                                                     | TYSN              | 8.03 | 4.54 | 54.52 | 3.07 | 36.48 | --   | --    | 7.14 | 129.28 | 7.27 | 130.51 | --    | --    | CH <sub>2</sub> SO <sub>3</sub> |       |       |       |
|                                                                                       |                   | --   | --   | --    | 2.94 | --    | --   | --    | --   | --     | --   | --     | --    | --    | 4.07                            | 56.47 |       |       |
| 4                                                                                     | GLN               | 8.24 | 4.25 | 52.80 | 1.95 | 26.59 | 2.17 | 30.91 | --   | --     | --   | --     | 7.46  | 6.75  |                                 |       |       |       |
|                                                                                       |                   | --   | --   | --    | 1.85 | --    | --   | --    | --   | --     | --   | --     | --    | --    |                                 |       |       |       |
| 5                                                                                     | VAL               | 8.13 | 4.06 | 59.43 | 2.01 | 30.10 | 0.87 | 17.59 | --   | --     | --   | --     | --    | --    |                                 |       |       |       |
| 6                                                                                     | SER               | 8.34 | 4.43 | 55.32 | 3.76 | 60.85 | --   | --    | --   | --     | --   | --     | --    | --    |                                 |       |       |       |
| 7                                                                                     | SER               | 8.26 | 4.68 | 53.32 | 3.77 | 60.71 | --   | --    | --   | --     | --   | --     | --    | --    |                                 |       |       |       |
|                                                                                       |                   | --   | --   | --    | 3.72 | --    | --   | --    | --   | --     | --   | --     | --    | --    |                                 |       |       |       |
| 8                                                                                     | PRO               | --   | 4.31 | 60.43 | 2.10 | 29.23 | 1.90 | 24.51 | 3.70 | 47.97  | --   | --     | --    | --    |                                 |       |       |       |
|                                                                                       |                   | --   | --   | --    | 1.67 | --    | --   | --    | 3.61 | --     | --   | --     | --    | --    |                                 |       |       |       |
| 9                                                                                     | ILE               | 7.98 | 3.96 | 58.44 | 1.62 | 35.97 | 1.26 | 24.54 | 0.72 | 10.01  | --   | --     | --    | --    | HG'                             | CG'   |       |       |
|                                                                                       |                   | --   | --   | --    | --   | --    | 1.00 | --    | --   | --     | --   | --     | --    | --    | 0.67                            | 14.57 |       |       |
| 10                                                                                    | TYSN              | 8.01 | 4.59 | 54.27 | 3.06 | 36.67 | --   | --    | 7.11 | 129.13 | 7.21 | 130.45 | --    | --    | CH <sub>2</sub> SO <sub>3</sub> |       |       |       |
|                                                                                       |                   | --   | --   | --    | 2.87 | --    | --   | --    | --   | --     | --   | --     | --    | --    | 3.99                            | 56.47 |       |       |
| 11                                                                                    | ASP               | 8.19 | 4.55 | 51.05 | 2.65 | 38.72 | --   | --    | --   | --     | --   | --     | --    | --    |                                 |       |       |       |
|                                                                                       |                   | --   | --   | --    | 2.50 | --    | --   | --    | --   | --     | --   | --     | --    | --    |                                 |       |       |       |
| 12                                                                                    | ILE               | 8.05 | 4.00 | 59.03 | 1.78 | 35.95 | 1.33 | 24.60 | 0.80 | 10.59  | --   | --     | --    | --    | HG'                             | CG'   |       |       |
|                                                                                       |                   | --   | --   | --    | --   | --    | 1.13 | --    | --   | --     | --   | --     | --    | --    | 0.75                            | 14.65 |       |       |
| 13                                                                                    | ASN               | 8.34 | 4.54 | 50.90 | 2.55 | 36.02 | --   | --    | --   | --     | --   | --     | 7.58  | 6.79  |                                 |       |       |       |
| 14                                                                                    | TYSN              | 7.95 | 4.40 | 55.44 | 2.93 | 36.34 | --   | --    | 6.95 | 129.13 | 7.20 | 130.50 | --    | --    | CH <sub>2</sub> SO <sub>3</sub> |       |       |       |
|                                                                                       |                   | --   | --   | --    | 2.87 | --    | --   | --    | --   | --     | --   | --     | --    | --    | 4.04                            | 56.47 |       |       |
| 15                                                                                    | TYR               | 7.94 | 4.49 | 55.30 | 2.99 | 35.99 | --   | --    | 7.04 | 130.56 | 6.73 | 115.51 | --    | --    |                                 |       |       |       |
|                                                                                       |                   | --   | --   | --    | 2.87 | --    | --   | --    | --   | --     | --   | --     | --    | --    |                                 |       |       |       |
| 16                                                                                    | THR               | 7.88 | 4.29 | 58.66 | 4.16 | 67.17 | 1.10 | 18.53 | --   | --     | --   | --     | --    | --    |                                 |       |       |       |
| 17                                                                                    | SER               | 8.19 | 4.34 | 55.81 | 3.83 | 61.00 | --   | --    | --   | --     | --   | --     | --    | --    |                                 |       |       |       |
|                                                                                       |                   | --   | --   | --    | 3.78 | --    | --   | --    | --   | --     | --   | --     | --    | --    |                                 |       |       |       |
| 18                                                                                    | GLU               | 8.36 | 4.22 | 54.10 | 2.00 | 27.46 | 2.18 | 35.22 | --   | --     | --   | --     | --    | --    |                                 |       |       |       |
|                                                                                       |                   | --   | --   | --    | 1.86 | --    | --   | --    | --   | --     | --   | --     | --    | --    |                                 |       |       |       |
| 19                                                                                    | GLY               | 8.25 | 3.89 | 42.49 | --   | --    | --   | --    | --   | --     | --   | --     | --    | --    |                                 |       |       |       |
| 20                                                                                    | PEG               | 8.28 | 4.42 | 53.45 | 3.75 | 69.50 | 3.54 | 69.88 | 3.50 | 69.35  | 3.61 | 69.47  | 3.52  | 69.44 | 3.91                            | 42.48 | 3.84  | 68.62 |
|                                                                                       |                   | --   | --   | --    | 3.67 | --    | --   | --    | --   | --     | --   | --     | --    | --    |                                 |       |       |       |
|                                                                                       | CONH <sub>2</sub> | --   | --   | --    | --   | --    | --   | --    | --   | --     | --   | --     | 7.55  | 7.10  | Ac(NH)                          | 1.88  | 21.75 |       |

|  |          |       |      |        |      |       |      |       |      |       |      |       |      |       |  |  |  |  |
|--|----------|-------|------|--------|------|-------|------|-------|------|-------|------|-------|------|-------|--|--|--|--|
|  | triazole | CH:   | 7.83 | 134.25 | --   | CH2:  | 4.48 | 49.88 | --   | NH:   | 8.36 | --    | --   | --    |  |  |  |  |
|  | Biotin   | imide | 2.16 | 33.47  | 1.51 | 24.90 | 1.23 | 27.71 | 1.56 | 27.47 | 3.16 | 55.29 | 4.47 | 60.27 |  |  |  |  |
|  |          |       | 6.34 | --     | --   | 1.43  | --   | --    | --   | 1.43  | --   | --    | --   | --    |  |  |  |  |
|  |          |       | 6.29 | --     | --   | --    | --   | --    | --   | --    | 2.86 | 39.71 | 4.25 | 62.03 |  |  |  |  |
|  |          |       | --   | --     | --   | --    | --   | --    | --   | --    | 2.66 | --    | --   | --    |  |  |  |  |
